# Supplementary material for: A comparative study on the quality of protein crystals obtained using the cross-diffusion microbatch and sitting-drop vapor diffusion methods
Source: Royal Society of Chemistry journal article supplement (doi:10.1039/c5ce00551e), 2015-01-01
Supplement: c5ce00551e1.pdf [file c5ce00551e1.pdf]

**Supplementary Material**

**A comparative study on the quality of protein crystals  
obtained using the cross-diffusion microbatch and  
sitting-drop vapor diffusion methods**

Hai Hou <sup>a, ‡</sup>, Bo Wang <sup>a, ‡</sup>, Shan-Yang Hu <sup>a</sup>, Jing-Zhang Wang <sup>b</sup>, Peng-Fei Zhu <sup>a</sup>, Yue  
Liu <sup>a</sup>, Meng-Ying Wang <sup>a</sup>, and Da-Chuan Yin <sup>a, \*</sup>

*<sup>a</sup>Key Laboratory for Space Bioscience & Biotechnology, School of Life Sciences,  
Northwestern Polytechnical University, Xi'an 710072, Shaanxi, P. R. China*

*<sup>b</sup>Department of Medical Technology, Affiliated Hospital, College of Medicine, Hebei University of Engineering, Handan 056002, Hebei, P. R. China*

Supplementary Figure S1. Comparison of images of the crystallization plate using the CDM method and the SDVD method. (a) Image of crystallization plate using the traditional sitting

---

drop vapor-diffusion (SDVD) method. (b) Image of crystallization plate using the cross-diffusion microbatch (CDM) method. The size of this plate is made to be compatible with the SBS standard plate. This crystallization plate is similar to the traditional SDVD plate, except for the material and the reservoir, which was replaced by more pits to increase the number of protein concentrations or pH gradients.

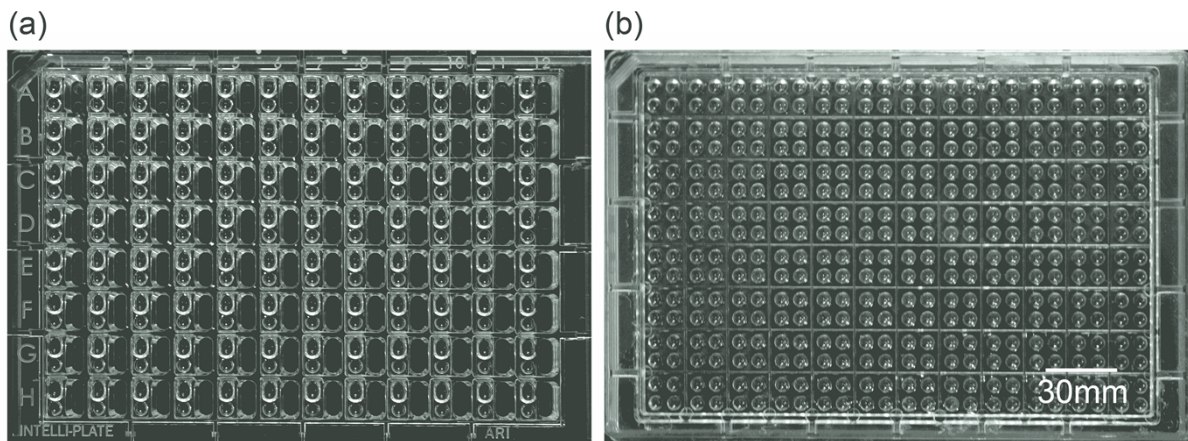

Supplementary Figure S2. (a) A comparison of crystallization screening hits for the 11 proteins using CDM and the traditional sitting drop vapor-diffusion method. (b) A statistical

analysis of the average screening hits between the CDM method and the traditional method (the error bars show the standard error of the mean;  $n = 11$ ). The number of hits was normalized based on the data for the CDM method. The results demonstrated an extremely significant difference between the two groups ( $n = 11$ ,  $P = 0.00026$ , *i.e.*  $<0.01$ ). The CDM method clearly increased the number of crystallization hits compared with the traditional sitting drop vapor-diffusion method.

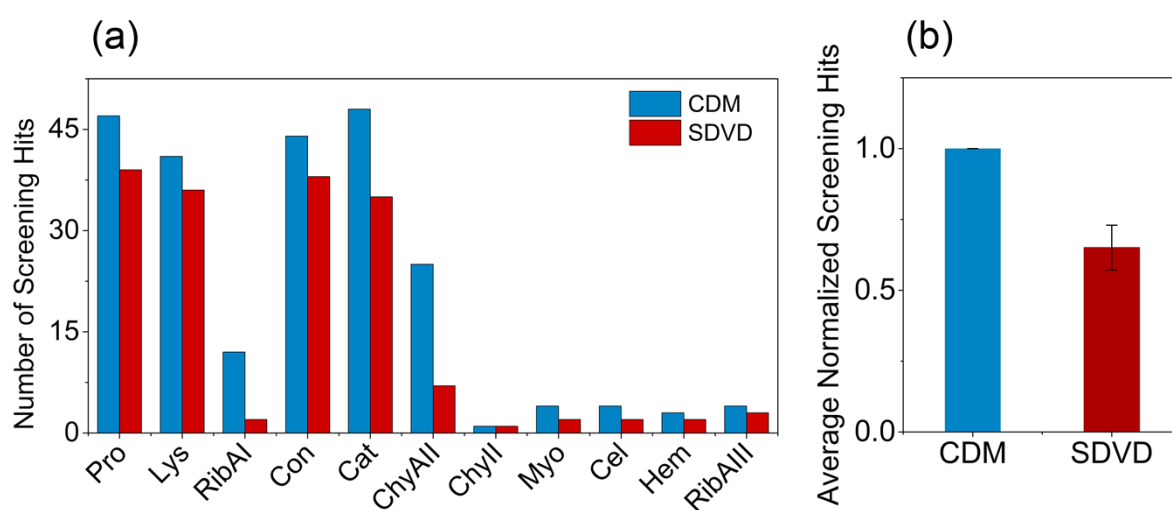

Supplementary Figure S3. Crystal morphology comparison between the CDM and SDVD crystallization plates. CDM: the crystals were optically better in the CDM plates than in the

---

SDVD plates. SDVD: the crystals were optically better in the SDVD plates than in the CDM plates. Comparable: the optical perfection of the crystals was comparable in the two plates. The results showed that more crystals grown in the CDM plates exhibited better optical perfection than those grown in the SDVD plates. The following criteria were used to compare the optical perfection: First, the crystals were categorized into different groups and ranked as follows: single crystal > single crystal with cracks > twin crystal > needle cluster > quasi-crystal. If the crystals were in the same group, then they were compared according to their size: larger crystals were defined as more optically perfect. If the crystal sizes were similar (size difference was within 5%), they were optically comparable.

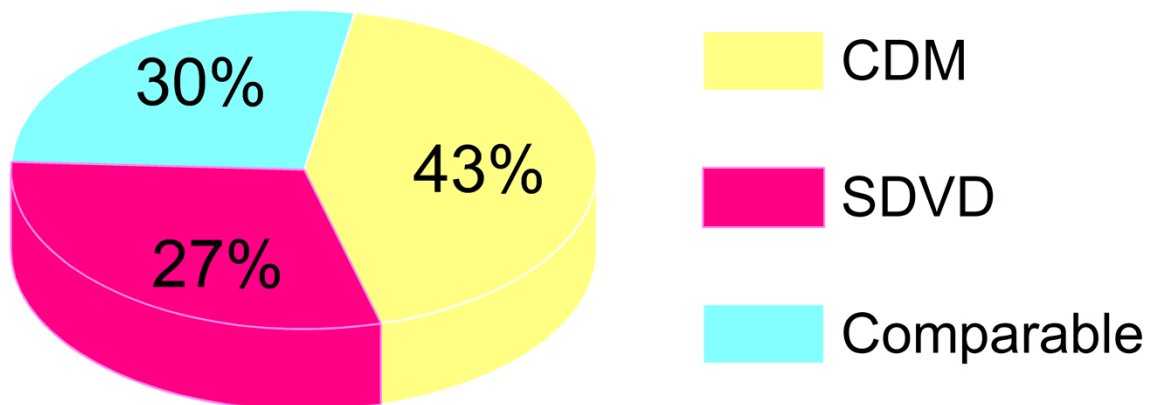

Supplementary Figure S4. (a) A statistical comparison of the mosaicity of the top 5 proteinase K crystals after normalization. However, for mosaicity, the results demonstrated

---

no significant difference between the two groups ( $n = 5$ ,  $P = 0.537$ , *i.e.*,  $>0.05$ ). (b) A statistical comparison of the mosaicity of the top 5 lysozyme crystals after normalization. Nevertheless, for the mosaicity, the difference between the two groups was not significant ( $n = 5$ ,  $P = 0.274$ , *i.e.*,  $>0.05$ ).

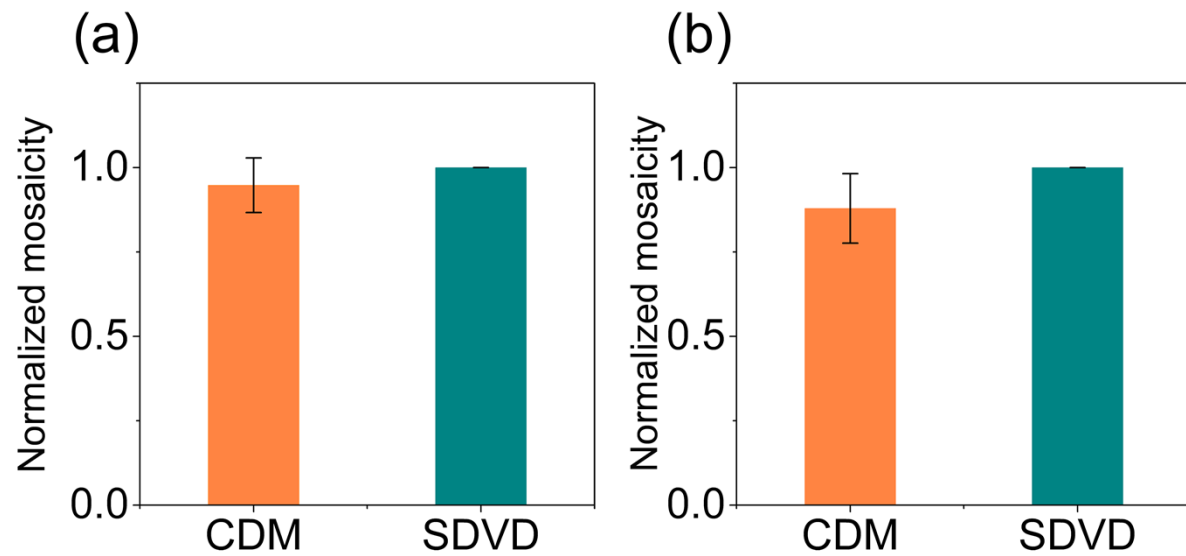

Supplementary Table S1. X-ray diffraction data statistics of 23 proteinase K crystals in CDM crystallization plate in same size

| Diffraction data statistics of proteinase K crystals in CDM crystallization plate |                                |                                |                                |                                |                                |
|-----------------------------------------------------------------------------------|--------------------------------|--------------------------------|--------------------------------|--------------------------------|--------------------------------|
| □                                                                                 | Crystal 1                      | Crystal 2                      | Crystal 3                      | Crystal 4                      | Crystal 5                      |
| Resolution range (Å)                                                              | 50-1.54<br>(1.57-1.54)         | 50-1.54<br>(1.57-1.54)         | 50-1.65<br>(1.68-1.65)         | 50-1.66<br>(1.69-1.66)         | 50-1.66<br>(1.69-1.66)         |
| Mosaicity (°)                                                                     | 0.47                           | 0.42                           | 0.60                           | 0.61                           | 0.46                           |
| $\langle I \rangle / \langle \sigma(I) \rangle$                                   | 25.91 (7.89)                   | 20.65 (3.39)                   | 15.58 (2.15)                   | 16.27 (2.76)                   | 13.60 (2.21)                   |
| Wilson Plot B factor                                                              | 6.50                           | 8.00                           | 7.40                           | 9.70                           | 7.60                           |
| Space group                                                                       | $P4_32_12$                     | $P4_32_12$                     | $P4_32_12$                     | $P4_32_12$                     | $P4_32_12$                     |
| Cell dimensions                                                                   | $a = 68.17$<br>$b = 68.17$     | $a = 67.74$<br>$b = 67.74$     | $a = 66.52$<br>$b = 66.52$     | $a = 68.05$<br>$b = 68.05$     | $a = 67.75$<br>$b = 67.75$     |
| $a, b, c$ (Å)                                                                     | $c = 102.13$                   | $c = 101.81$                   | $c = 99.51$                    | $c = 102.34$                   | $c = 100.56$                   |
| $\alpha, \beta, \gamma$ (°)                                                       | $\alpha = \beta = \gamma = 90$ |
| Exposure time (min)                                                               |                                |                                | 5                              |                                |                                |
| Oscillation angle (°)                                                             |                                |                                | 1                              |                                |                                |
| Detector distance (mm)                                                            |                                |                                | 150                            |                                |                                |
| Wavelength (Å)                                                                    |                                |                                | 1.54179                        |                                |                                |

Values in parentheses are for the highest resolution shell.

Continued Supplementary Table S1

| Diffraction data statistics of proteinase K crystals in CDM crystallization plate |                                |                                |                                |                                |                                |
|-----------------------------------------------------------------------------------|--------------------------------|--------------------------------|--------------------------------|--------------------------------|--------------------------------|
| ☐                                                                                 | Crystal 6                      | Crystal 7                      | Crystal 8                      | Crystal 9                      | Crystal 10                     |
| Resolution range                                                                  | 50-1.66                        | 50-1.66                        | 50-1.66                        | 50-1.73                        | 50-1.76                        |
| (Å)                                                                               | (1.69-1.66)                    | (1.69-1.66)                    | (1.69-1.66)                    | (1.76-1.73)                    | (1.79-1.76)                    |
| Mosaicity (°)                                                                     | 0.41                           | 0.45                           | 0.64                           | 0.53                           | 0.46                           |
| $\langle I \rangle / \langle \sigma(I) \rangle$                                   | 14.53 (2.44)                   | 19.49 (4.50)                   | 19.12 (2.70)                   | 12.06 (2.09)                   | 11.79 (2.04)                   |
| Wilson Plot B factor                                                              | 9.90                           | 8.40                           | 9.80                           | 8.30                           | 11.10                          |
| Space group                                                                       | $P4_32_12$                     | $P4_32_12$                     | $P4_32_12$                     | $P4_32_12$                     | $P4_32_12$                     |
| Cell dimensions                                                                   | $a = 67.72$                    | $a = 67.74$                    | $a = 68.02$                    | $a = 67.63$                    | $a = 67.80$                    |
| $a, b, c$ (Å)                                                                     | $b = 67.72$                    | $b = 67.74$                    | $b = 68.02$                    | $b = 67.63$                    | $b = 67.80$                    |
| $\alpha, \beta, \gamma$ (°)                                                       | $c = 102.26$                   | $c = 101.90$                   | $c = 101.83$                   | $c = 101.72$                   | $c = 102.34$                   |
|                                                                                   | $\alpha = \beta = \gamma = 90$ |
| Exposure time (min)                                                               |                                |                                | 5                              |                                |                                |
| Oscillation angle (°)                                                             |                                |                                | 1                              |                                |                                |
| Detector distance (mm)                                                            |                                |                                | 150                            |                                |                                |
| Wavelength (Å)                                                                    |                                |                                | 1.54179                        |                                |                                |

Values in parentheses are for the highest resolution shell.

Continued Supplementary Table S1

| Diffraction data statistics of proteinase K crystals in CDM crystallization plate |                                          |                                          |                                          |                                          |                                          |
|-----------------------------------------------------------------------------------|------------------------------------------|------------------------------------------|------------------------------------------|------------------------------------------|------------------------------------------|
| □                                                                                 | Crystal 11                               | Crystal 12                               | Crystal 13                               | Crystal 14                               | Crystal 15                               |
| Resolution range                                                                  | 50-1.78                                  | 50-1.82                                  | 50-1.83                                  | 50-1.84                                  | 50-1.85                                  |
| (Å)                                                                               | (1.81-1.78)                              | (1.85-1.82)                              | (1.86-1.83)                              | (1.87-1.84)                              | (1.88-1.85)                              |
| Mosaicity (°)                                                                     | 0.57                                     | 0.58                                     | 0.50                                     | 0.38                                     | 0.93                                     |
| $\langle I \rangle / \langle \sigma(I) \rangle$                                   | 14.93 (2.09)                             | 13.29 (2.26)                             | 11.54 (2.23)                             | 9.70 (2.31)                              | 13.96 (2.01)                             |
| Wilson Plot B factor                                                              | 13.00                                    | 12.90                                    | 11.10                                    | 8.30                                     | 11.00                                    |
| Space group                                                                       | <i>P</i> 4 <sub>3</sub> 2 <sub>1</sub> 2 |
| Cell dimensions                                                                   | <i>a</i> = 67.54                         | <i>a</i> = 67.41                         | <i>a</i> = 67.80                         | <i>a</i> = 67.72                         | <i>a</i> = 67.88                         |
|                                                                                   | <i>b</i> = 67.54                         | <i>b</i> = 67.41                         | <i>b</i> = 67.80                         | <i>b</i> = 67.72                         | <i>b</i> = 67.88                         |
|                                                                                   | <i>c</i> = 101.72                        | <i>c</i> = 100.98                        | <i>c</i> = 102.44                        | <i>c</i> = 102.22                        | <i>c</i> = 101.49                        |
| $\alpha, \beta, \gamma$ (°)                                                       | $\alpha = \beta = \gamma = 90$           |
| Exposure time (min)                                                               |                                          |                                          | 5                                        |                                          |                                          |
| Oscillation angle (°)                                                             |                                          |                                          | 1                                        |                                          |                                          |
| Detector distance (mm)                                                            |                                          |                                          | 150                                      |                                          |                                          |
| Wavelength (Å)                                                                    |                                          |                                          | 1.54179                                  |                                          |                                          |

Values in parentheses are for the highest resolution shell.



Continued Supplementary Table S1

| Diffraction data statistics of proteinase K crystals in CDM crystallization plate |                                     |                                     |                                     |                                     |                                     |
|-----------------------------------------------------------------------------------|-------------------------------------|-------------------------------------|-------------------------------------|-------------------------------------|-------------------------------------|
| ☐                                                                                 | Crystal 16                          | Crystal 17                          | Crystal 18                          | Crystal 19                          | Crystal 20                          |
| Resolution range                                                                  | 50-1.86                             | 50-1.87                             | 50-1.88                             | 50-1.93                             | 50-1.99                             |
| (Å)                                                                               | (1.89-1.86)                         | (1.90-1.87)                         | (1.91-1.88)                         | (1.96-1.93)                         | (2.02-1.99)                         |
| Mosaicity (°)                                                                     | 1.00                                | 0.51                                | 0.42                                | 0.63                                | 0.44                                |
| $\langle I \rangle / \langle \sigma(I) \rangle$                                   | 20.22 (4.16)                        | 10.72 (2.16)                        | 7.95 (2.15)                         | 14.51 (2.07)                        | 7.91(2.01)                          |
| Wilson Plot B factor                                                              | 10.30                               | 13.00                               | 12.80                               | 18.60                               | 12.00                               |
| Space group                                                                       | <i>P4<sub>3</sub>2<sub>1</sub>2</i> | <i>P4<sub>3</sub>2<sub>1</sub>2</i> | <i>P4<sub>3</sub>2<sub>1</sub>2</i> | <i>P4<sub>3</sub>2<sub>1</sub>2</i> | <i>P4<sub>3</sub>2<sub>1</sub>2</i> |
| Cell dimensions                                                                   | <i>a</i> = 67.99                    | <i>a</i> = 67.76                    | <i>a</i> = 67.78                    | <i>a</i> = 67.73                    | <i>a</i> = 67.77                    |
|                                                                                   | <i>b</i> = 67.99                    | <i>b</i> = 67.76                    | <i>b</i> = 67.78                    | <i>b</i> = 67.73                    | <i>b</i> = 67.77                    |
|                                                                                   | <i>c</i> = 101.83                   | <i>c</i> = 101.53                   | <i>c</i> = 102.82                   | <i>c</i> = 101.65                   | <i>c</i> = 102.51                   |
| $\alpha, \beta, \gamma$ (°)                                                       | $\alpha = \beta = \gamma = 90$      |
| Exposure time (min)                                                               |                                     |                                     | 5                                   |                                     |                                     |
| Oscillation angle (°)                                                             |                                     |                                     | 1                                   |                                     |                                     |
| Detector distance (mm)                                                            |                                     |                                     | 150                                 |                                     |                                     |
| Wavelength (Å)                                                                    |                                     |                                     | 1.54179                             |                                     |                                     |

Values in parentheses are for the highest resolution shell.

Continued Supplementary Table S1

| □                                               | Diffraction data statistics of proteinase K crystals in |                                     |                                     |
|-------------------------------------------------|---------------------------------------------------------|-------------------------------------|-------------------------------------|
|                                                 | CDM crystallization plate                               |                                     |                                     |
|                                                 | Crystal 21                                              | Crystal 22                          | Crystal 23                          |
|                                                 | 50-2.17                                                 | 50-2.18                             | 50-2.20                             |
| Resolution range (Å)                            | (2.21-2.17)                                             | (2.22-2.18)                         | (2.24-2.20)                         |
| Mosaicity (°)                                   | 0.98                                                    | 0.80                                | 0.49                                |
| $\langle I \rangle / \langle \sigma(I) \rangle$ | 8.40 (2.65)                                             | 7.26 (2.30)                         | 9.06 (2.22)                         |
| Wilson Plot B factor                            | 13.00                                                   | 12.30                               | 17.40                               |
| Space group                                     | <i>P4<sub>3</sub>2<sub>1</sub>2</i>                     | <i>P4<sub>3</sub>2<sub>1</sub>2</i> | <i>P4<sub>3</sub>2<sub>1</sub>2</i> |
| Cell dimensions                                 | <i>a</i> = 67.84                                        | <i>a</i> = 67.87                    | <i>a</i> = 67.59                    |
|                                                 | <i>b</i> = 67.84                                        | <i>b</i> = 67.87                    | <i>b</i> = 67.59                    |
|                                                 | <i>c</i> = 101.79                                       | <i>c</i> = 102.21                   | <i>c</i> = 101.46                   |
| <i>a, b, c</i> (Å)                              |                                                         |                                     |                                     |
| $\alpha, \beta, \gamma$ (°)                     | $\alpha = \beta = \gamma = 90$                          | $\alpha = \beta = \gamma = 90$      | $\alpha = \beta = \gamma = 90$      |
| Exposure time (min)                             |                                                         | 5                                   |                                     |
| Oscillation angle (°)                           |                                                         | 1                                   |                                     |
| Detector distance (mm)                          |                                                         | 150                                 |                                     |
| Wavelength (Å)                                  |                                                         | 1.54179                             |                                     |

Values in parentheses are for the highest resolution shell.

Supplementary Table S2. X-ray diffraction data statistics of 20 proteinase K crystals in SDVD crystallization plate in same size

| Diffraction data statistics of proteinase K crystals in SDVD crystallization plate |                                |                                |                                |                                |                                |
|------------------------------------------------------------------------------------|--------------------------------|--------------------------------|--------------------------------|--------------------------------|--------------------------------|
| □                                                                                  | Crystal 1                      | Crystal 2                      | Crystal 3                      | Crystal 4                      | Crystal 5                      |
| Resolution range (Å)                                                               | 50-1.66<br>(1.69-1.66)         | 50-1.66<br>(1.69-1.66)         | 50-1.70<br>(1.70-1.73)         | 50-1.72<br>(1.75-1.72)         | 50-1.73<br>(1.76-1.73)         |
| Mosaicity (°)                                                                      | 0.66                           | 0.46                           | 0.51                           | 0.57                           | 0.53                           |
| $\langle I \rangle / \langle \sigma(I) \rangle$                                    | 20.96 (3.32)                   | 17.63 (2.70)                   | 13.45 (2.04)                   | 13.65 (2.13)                   | 11.92 (2.19)                   |
| Wilson Plot B factor                                                               | 13.30                          | 11.50                          | 11.90                          | 10.40                          | 11.00                          |
| Space group                                                                        | $P4_32_12$                     | $P4_32_12$                     | $P4_32_12$                     | $P4_32_12$                     | $P4_32_12$                     |
| Cell dimensions                                                                    | $a = 68.10$<br>$b = 68.10$     | $a = 68.12$<br>$b = 68.12$     | $a = 67.93$<br>$b = 67.93$     | $a = 67.82$<br>$b = 67.82$     | $a = 67.43$<br>$b = 67.43$     |
| $a, b, c$ (Å)                                                                      | $c = 101.90$                   | $c = 102.33$                   | $c = 101.62$                   | $c = 101.41$                   | $c = 101.00$                   |
| $\alpha, \beta, \gamma$ (°)                                                        | $\alpha = \beta = \gamma = 90$ |
| Exposure time (min)                                                                |                                |                                | 5                              |                                |                                |
| Oscillation angle (°)                                                              |                                |                                | 1                              |                                |                                |
| Detector distance (mm)                                                             |                                |                                | 150                            |                                |                                |
| Wavelength (Å)                                                                     |                                |                                | 1.54179                        |                                |                                |

Values in parentheses are for the highest resolution shell.

Continued Supplementary Table S2

| Diffraction data statistics of proteinase K crystals in SDVD crystallization plate |                                |                                |                                |                                |                                |
|------------------------------------------------------------------------------------|--------------------------------|--------------------------------|--------------------------------|--------------------------------|--------------------------------|
| ☐                                                                                  | Crystal 6                      | Crystal 7                      | Crystal 8                      | Crystal 9                      | Crystal 10                     |
| Resolution range                                                                   | 50-1.77                        | 50-1.78                        | 50-1.85                        | 50-1.86                        | 50-1.87                        |
| (Å)                                                                                | (1.80-1.77)                    | (1.81-1.78)                    | (1.88-1.85)                    | (1.89-1.86)                    | (1.90-1.87)                    |
| Mosaicity (°)                                                                      | 0.79                           | 0.75                           | 1.28                           | 0.78                           | 0.61                           |
| $\langle I \rangle / \langle \sigma(I) \rangle$                                    | 14.45 (2.07)                   | 13.07 (2.08)                   | 10.34 (3.63)                   | 17.62 (2.58)                   | 7.85 (2.07)                    |
| Wilson Plot B factor                                                               | 11.30                          | 12.40                          | 10.60                          | 14.40                          | 19.60                          |
| Space group                                                                        | $P4_32_12$                     | $P4_32_12$                     | $P4_32_12$                     | $P4_32_12$                     | $P4_32_12$                     |
| Cell dimensions                                                                    | $a = 68.19$                    | $a = 67.72$                    | $a = 67.90$                    | $a = 67.32$                    | $a = 67.98$                    |
|                                                                                    | $b = 68.19$                    | $b = 67.72$                    | $b = 67.90$                    | $b = 67.32$                    | $b = 67.98$                    |
|                                                                                    | $c = 102.04$                   | $c = 100.50$                   | $c = 95.15$                    | $c = 102.17$                   | $c = 101.88$                   |
| $\alpha, \beta, \gamma$ (°)                                                        | $\alpha = \beta = \gamma = 90$ |
| Exposure time (min)                                                                |                                |                                | 5                              |                                |                                |
| Oscillation angle (°)                                                              |                                |                                | 1                              |                                |                                |
| Detector distance (mm)                                                             |                                |                                | 150                            |                                |                                |
| Wavelength (Å)                                                                     |                                |                                | 1.54179                        |                                |                                |

Values in parentheses are for the highest resolution shell.

Continued Supplementary Table S2

| Diffraction data statistics of proteinase K crystals in SDVD crystallization plate |                                          |                                          |                                          |                                          |                                          |
|------------------------------------------------------------------------------------|------------------------------------------|------------------------------------------|------------------------------------------|------------------------------------------|------------------------------------------|
| ☐                                                                                  | Crystal 11                               | Crystal 12                               | Crystal 13                               | Crystal 14                               | Crystal 15                               |
| Resolution range                                                                   | 50-1.95                                  | 50-1.98                                  | 50-2.05                                  | 50-2.08                                  | 50-2.09                                  |
| (Å)                                                                                | (1.98-1.95)                              | (2.01-1.98)                              | (2.09-2.05)                              | (2.12-2.08)                              | (2.13-2.09)                              |
| Mosaicity (°)                                                                      | 0.69                                     | 1.39                                     | 0.83                                     | 1.12                                     | 1.61                                     |
| $\langle I \rangle / \langle \sigma(I) \rangle$                                    | 9.58 (2.07)                              | 11.82 (2.33)                             | 6.10 (2.04)                              | 10.85 (2.17)                             | 11.18 (2.13)                             |
| Wilson Plot B factor                                                               | 11.60                                    | 18.30                                    | 15.90                                    | 16.40                                    | 10.10                                    |
| Space group                                                                        | <i>P</i> 4 <sub>3</sub> 2 <sub>1</sub> 2 |
| Cell dimensions                                                                    | <i>a</i> = 67.75                         | <i>a</i> = 67.75                         | <i>a</i> = 67.95                         | <i>a</i> = 66.66                         | <i>a</i> = 67.59                         |
| <i>a</i> , <i>b</i> , <i>c</i> (Å)                                                 | <i>b</i> = 67.75                         | <i>b</i> = 67.75                         | <i>b</i> = 67.95                         | <i>b</i> = 66.66                         | <i>b</i> = 67.59                         |
| $\alpha$ , $\beta$ , $\gamma$ (°)                                                  | <i>c</i> = 101.21                        | <i>c</i> = 101.58                        | <i>c</i> = 101.61                        | <i>c</i> = 100.10                        | <i>c</i> = 100.84                        |
| Exposure time (min)                                                                | $\alpha = \beta = \gamma = 90$           |
| Oscillation angle (°)                                                              |                                          |                                          | 5                                        |                                          |                                          |
| Detector distance (mm)                                                             |                                          |                                          | 1                                        |                                          |                                          |
| Wavelength (Å)                                                                     |                                          |                                          | 150                                      |                                          |                                          |
|                                                                                    |                                          |                                          | 1.54179                                  |                                          |                                          |

Values in parentheses are for the highest resolution shell.

Continued Supplementary Table S2

| Diffraction data statistics of proteinase K crystals in SDVD crystallization plate |                                |                                |                                |                                |                                |
|------------------------------------------------------------------------------------|--------------------------------|--------------------------------|--------------------------------|--------------------------------|--------------------------------|
| ☐                                                                                  | Crystal 16                     | Crystal 17                     | Crystal 18                     | Crystal 19                     | Crystal 20                     |
| Resolution range                                                                   | 50-2.11                        | 50-2.20                        | 50-2.38                        | 50-2.78                        | 50-3.07                        |
| (Å)                                                                                | (2.15-2.11)                    | (2.24-2.20)                    | (2.42-2.38)                    | (2.83-2.78)                    | (3.12-3.07)                    |
| Mosaicity (°)                                                                      | 0.81                           | 0.47                           | 0.39                           | 0.38                           | 0.48                           |
| $\langle I \rangle / \langle \sigma(I) \rangle$                                    | 9.62 (7.99)                    | 5.14 (2.09)                    | 5.34 (2.40)                    | 5.09 (2.31)                    | 3.96 (2.96)                    |
| Wilson Plot B factor                                                               | 17.70                          | 17.70                          | 17.30                          | 16.00                          | 21.20                          |
| Space group                                                                        | $P4_32_12$                     | $P4_32_12$                     | $P4_32_12$                     | $P4_32_12$                     | $P4_32_12$                     |
| Cell dimensions                                                                    | $a = 68.03$                    | $a = 67.72$                    | $a = 67.84$                    | $a = 67.73$                    | $a = 67.69$                    |
| $a, b, c$ (Å)                                                                      | $b = 68.03$                    | $b = 67.72$                    | $b = 67.84$                    | $b = 67.73$                    | $b = 67.69$                    |
| $\alpha, \beta, \gamma$ (°)                                                        | $c = 102.80$                   | $c = 102.11$                   | $c = 102.63$                   | $c = 102.59$                   | $c = 102.37$                   |
|                                                                                    | $\alpha = \beta = \gamma = 90$ |
| Exposure time (min)                                                                |                                |                                | 5                              |                                |                                |
| Oscillation angle (°)                                                              |                                |                                | 1                              |                                |                                |
| Detector distance (mm)                                                             |                                |                                | 150                            |                                |                                |
| Wavelength (Å)                                                                     |                                |                                | 1.54179                        |                                |                                |

Values in parentheses are for the highest resolution shell.

Supplementary Table S3. X-ray diffraction data statistics of 27 lysozyme crystals in CDM crystallization plate in same size

| Diffraction data statistics of lysozyme crystals in CDM crystallization plate |                                |                                |                                |                                |                                |
|-------------------------------------------------------------------------------|--------------------------------|--------------------------------|--------------------------------|--------------------------------|--------------------------------|
| □                                                                             | Crystal 1                      | Crystal 2                      | Crystal 3                      | Crystal 4                      | Crystal 5                      |
| Resolution range (Å)                                                          | 50-1.66                        | 50-1.66                        | 50-1.78                        | 50-1.83                        | 50-1.86                        |
|                                                                               | (1.69-1.66)                    | (1.69-1.66)                    | (1.81-1.78)                    | (1.86-1.83)                    | (1.89-1.86)                    |
| Mosaicity (°)                                                                 | 0.60                           | 0.57                           | 0.83                           | 0.52                           | 0.74                           |
| $\langle I \rangle / \langle \sigma(I) \rangle$                               | 23.18 (8.58)                   | 24.29 (2.11)                   | 21.92 (2.24)                   | 15.85 (2.02)                   | 19.98 (2.12)                   |
| Wilson Plot B factor                                                          | 16.40                          | 14.00                          | 18.20                          | 19.40                          | 14.10                          |
| Space group                                                                   | $P4_32_12$                     | $P4_32_12$                     | $P4_32_12$                     | $P4_32_12$                     | $P4_32_12$                     |
| Cell dimensions                                                               | $a = 76.91$                    | $a = 78.22$                    | $a = 78.02$                    | $a = 76.47$                    | $a = 76.71$                    |
|                                                                               | $b = 76.91$                    | $b = 78.22$                    | $b = 78.02$                    | $b = 76.47$                    | $b = 76.71$                    |
| $a, b, c$ (Å)                                                                 | $c = 38.35$                    | $c = 37.62$                    | $c = 37.55$                    | $c = 37.58$                    | $c = 37.32$                    |
| $\alpha, \beta, \gamma$ (°)                                                   | $\alpha = \beta = \gamma = 90$ |
| Exposure time (min)                                                           |                                |                                | 5                              |                                |                                |
| Oscillation angle (°)                                                         |                                |                                | 1                              |                                |                                |
| Detector distance (mm)                                                        |                                |                                | 150                            |                                |                                |
| Wavelength (Å)                                                                |                                |                                | 1.54179                        |                                |                                |

Values in parentheses are for the highest resolution shell.

Continued Supplementary Table S3

| Diffraction data statistics of lysozyme crystals in CDM crystallization plate |                                          |                                          |                                          |                                          |                                          |
|-------------------------------------------------------------------------------|------------------------------------------|------------------------------------------|------------------------------------------|------------------------------------------|------------------------------------------|
| ☐                                                                             | Crystal 6                                | Crystal 7                                | Crystal 8                                | Crystal 9                                | Crystal 10                               |
| Resolution range                                                              | 50-1.86                                  | 50-1.86                                  | 50-1.86                                  | 50-1.86                                  | 50-1.86                                  |
| (Å)                                                                           | (1.89-1.86)                              | (1.89-1.86)                              | (1.89-1.86)                              | (1.89-1.86)                              | (1.89-1.86)                              |
| Mosaicity (°)                                                                 | 0.59                                     | 0.82                                     | 0.84                                     | 0.89                                     | 0.52                                     |
| $\langle I \rangle / \langle \sigma(I) \rangle$                               | 18.70 (3.34)                             | 18.75 (2.12)                             | 15.50 (3.05)                             | 22.0 (2.46)                              | 12.93 (3.67)                             |
| Wilson Plot B factor                                                          | 18.90                                    | 15.00                                    | 14.70                                    | 16.90                                    | 20.70                                    |
| Space group                                                                   | <i>P</i> 4 <sub>3</sub> 2 <sub>1</sub> 2 |
| Cell dimensions                                                               | <i>a</i> = 76.80                         | <i>a</i> = 76.47                         | <i>a</i> = 76.91                         | <i>a</i> = 76.77                         | <i>a</i> = 76.82                         |
| <i>a</i> , <i>b</i> , <i>c</i> (Å)                                            | <i>b</i> = 76.80                         | <i>b</i> = 76.47                         | <i>b</i> = 76.91                         | <i>b</i> = 76.77                         | <i>b</i> = 76.82                         |
| $\alpha$ , $\beta$ , $\gamma$ (°)                                             | <i>c</i> = 37.35                         | <i>c</i> = 37.58                         | <i>c</i> = 37.74                         | <i>c</i> = 37.27                         | <i>c</i> = 37.39                         |
|                                                                               | $\alpha = \beta = \gamma = 90$           |
| Exposure time (min)                                                           |                                          |                                          | 5                                        |                                          |                                          |
| Oscillation angle (°)                                                         |                                          |                                          | 1                                        |                                          |                                          |
| Detector distance (mm)                                                        |                                          |                                          | 150                                      |                                          |                                          |
| Wavelength (Å)                                                                |                                          |                                          | 1.54179                                  |                                          |                                          |

Values in parentheses are for the highest resolution shell.



Continued Supplementary Table S3

| Diffraction data statistics of lysozyme crystals in CDM crystallization plate |                                |                                |                                |                                |                                |
|-------------------------------------------------------------------------------|--------------------------------|--------------------------------|--------------------------------|--------------------------------|--------------------------------|
| ☐                                                                             | Crystal 11                     | Crystal 12                     | Crystal 13                     | Crystal 14                     | Crystal 15                     |
| Resolution range                                                              | 50-1.87                        | 50-1.92                        | 50-1.93                        | 50-1.94                        | 50-1.94                        |
| (Å)                                                                           | (1.90-1.87)                    | (1.95-1.92)                    | (1.96-1.93)                    | (1.97-1.94)                    | (1.97-1.94)                    |
| Mosaicity (°)                                                                 | 0.83                           | 1.03                           | 0.50                           | 0.86                           | 0.86                           |
| $\langle I \rangle / \langle \sigma(I) \rangle$                               | 17.73 (2.89)                   | 16.84 (2.44)                   | 10.85 (2.02)                   | 18.37 (2.145)                  | 14.36 (2.56)                   |
| Wilson Plot B factor                                                          | 22.20                          | 20.20                          | 21.40                          | 25.30                          | 24.10                          |
| Space group                                                                   | $P4_32_12$                     | $P4_32_12$                     | $P4_32_12$                     | $P4_32_12$                     | $P4_32_12$                     |
| Cell dimensions                                                               | $a = 77.24$                    | $a = 76.57$                    | $a = 76.67$                    | $a = 77.27$                    | $a = 76.43$                    |
| $a, b, c$ (Å)                                                                 | $b = 77.24$                    | $b = 76.57$                    | $b = 76.67$                    | $b = 77.27$                    | $b = 76.43$                    |
| $\alpha, \beta, \gamma$ (°)                                                   | $c = 37.81$                    | $c = 37.08$                    | $c = 37.20$                    | $c = 37.07$                    | $c = 36.74$                    |
|                                                                               | $\alpha = \beta = \gamma = 90$ |
| Exposure time (min)                                                           |                                |                                | 5                              |                                |                                |
| Oscillation angle (°)                                                         |                                |                                | 1                              |                                |                                |
| Detector distance (mm)                                                        |                                |                                | 150                            |                                |                                |
| Wavelength (Å)                                                                |                                |                                | 1.54179                        |                                |                                |

Values in parentheses are for the highest resolution shell.

Continued Supplementary Table S3

| Diffraction data statistics of lysozyme crystals in CDM crystallization plate |                                |                                |                                |                                |                                |
|-------------------------------------------------------------------------------|--------------------------------|--------------------------------|--------------------------------|--------------------------------|--------------------------------|
| □                                                                             | Crystal 16                     | Crystal 17                     | Crystal 18                     | Crystal 19                     | Crystal 20                     |
|                                                                               | 50-2.02                        | 50-2.03                        | 50-2.08                        | 50-2.09                        | 50-2.10                        |
| Resolution range (Å)                                                          | (2.05-2.02)                    | (2.06-2.03)                    | (2.12-2.08)                    | (2.13-2.09)                    | (2.14-2.10)                    |
| Mosaicity (°)                                                                 | 1.08                           | 0.61                           | 0.52                           | 1.01                           | 0.70                           |
| $\langle I \rangle / \langle \sigma(I) \rangle$                               | 14.49 (2.30)                   | 18.16 (3.23)                   | 13.86 (2.14)                   | 17.36 (2.01)                   | 21.14 (2.30)                   |
| Wilson Plot B factor                                                          | 14.70                          | 23.20                          | 23.60                          | 19.20                          | 21.40                          |
| Space group                                                                   | $P4_32_12$                     | $P4_32_12$                     | $P4_32_12$                     | $P4_32_12$                     | $P4_32_12$                     |
| Cell dimensions                                                               | $a = 77.00$                    | $a = 78.30$                    | $a = 77.29$                    | $a = 76.09$                    | $a = 78.79$                    |
|                                                                               | $b = 77.00$                    | $b = 78.30$                    | $b = 77.29$                    | $b = 76.09$                    | $b = 78.79$                    |
|                                                                               | $c = 37.70$                    | $c = 35.93$                    | $c = 37.04$                    | $c = 37.17$                    | $c = 35.41$                    |
| $\alpha, \beta, \gamma$ (°)                                                   | $\alpha = \beta = \gamma = 90$ |
| Exposure time (min)                                                           |                                |                                | 5                              |                                |                                |
| Oscillation angle (°)                                                         |                                |                                | 1                              |                                |                                |
| Detector distance (mm)                                                        |                                |                                | 150                            |                                |                                |
| Wavelength (Å)                                                                |                                |                                | 1.54179                        |                                |                                |

Values in parentheses are for the highest resolution shell.

Continued Supplementary Table S3

| Diffraction data statistics of lysozyme crystals in CDM crystallization plate |                                          |                                          |                                          |                                          |                                          |
|-------------------------------------------------------------------------------|------------------------------------------|------------------------------------------|------------------------------------------|------------------------------------------|------------------------------------------|
| ☐                                                                             | Crystal 21                               | Crystal 22                               | Crystal 23                               | Crystal 24                               | Crystal 25                               |
| Resolution range                                                              | 50-2.12                                  | 50-2.12                                  | 50-2.21                                  | 50-2.23                                  | 50-2.23                                  |
| (Å)                                                                           | (2.16-2.12)                              | (2.16-2.12)                              | (2.25-2.21)                              | (2.27-2.23)                              | (2.27-2.23)                              |
| Mosaicity (°)                                                                 | 1.03                                     | 1.18                                     | 0.96                                     | 0.62                                     | 0.62                                     |
| $\langle I \rangle / \langle \sigma(I) \rangle$                               | 15.56 (2.17)                             | 24.25 (2.38)                             | 22.49 (8.30)                             | 10.32 (2.09)                             | 11.40 (2.35)                             |
| Wilson Plot B factor                                                          | 21.40                                    | 22.60                                    | 19.80                                    | 27.10                                    | 25.40                                    |
| Space group                                                                   | <i>P</i> 4 <sub>3</sub> 2 <sub>1</sub> 2 |
| Cell dimensions                                                               | <i>a</i> = 75.72                         | <i>a</i> = 76.12                         | <i>a</i> = 77.99                         | <i>a</i> = 76.66                         | <i>a</i> = 77.66                         |
|                                                                               | <i>b</i> = 75.72                         | <i>b</i> = 76.12                         | <i>b</i> = 77.99                         | <i>b</i> = 76.66                         | <i>b</i> = 77.66                         |
|                                                                               | <i>c</i> = 36.83                         | <i>c</i> = 37.18                         | <i>c</i> = 36.86                         | <i>c</i> = 37.51                         | <i>c</i> = 37.46                         |
| $\alpha, \beta, \gamma$ (°)                                                   | $\alpha = \beta = \gamma = 90$           |
| Exposure time (min)                                                           |                                          |                                          | 5                                        |                                          |                                          |
| Oscillation angle (°)                                                         |                                          |                                          | 1                                        |                                          |                                          |
| Detector distance (mm)                                                        |                                          |                                          | 150                                      |                                          |                                          |
| Wavelength (Å)                                                                |                                          |                                          | 1.54179                                  |                                          |                                          |

Values in parentheses are for the highest resolution shell.

Continued Supplementary Table S3

| □                                               | Diffraction data statistics of<br>lysozyme crystals in CDM<br>crystallization plate |                                |
|-------------------------------------------------|-------------------------------------------------------------------------------------|--------------------------------|
|                                                 | Crystal 26                                                                          | Crystal 27                     |
| Resolution range (Å)                            | 50-2.38<br>(2.42-2.38)                                                              | 50-2.72<br>(2.77-2.72)         |
| Mosaicity (°)                                   | 0.99                                                                                | 0.58                           |
| $\langle I \rangle / \langle \sigma(I) \rangle$ | 16.68 (2.72)                                                                        | 6.29 (2.56)                    |
| Wilson Plot B factor                            | 27.10                                                                               | 25.40                          |
| Space group                                     | $P4_32_12$                                                                          | $P4_32_12$                     |
| Cell dimensions<br>$a, b, c$ (Å)                | $a = 78.45$                                                                         | $a = 76.83$                    |
|                                                 | $b = 78.45$                                                                         | $b = 76.83$                    |
|                                                 | $c = 36.21$                                                                         | $c = 37.11$                    |
| $\alpha, \beta, \gamma$ (°)                     | $\alpha = \beta = \gamma = 90$                                                      | $\alpha = \beta = \gamma = 90$ |
| Exposure time (min)                             |                                                                                     | 5                              |
| Oscillation angle (°)                           |                                                                                     | 1                              |
| Detector distance<br>(mm)                       |                                                                                     | 150                            |
| Wavelength (Å)                                  |                                                                                     | 1.54179                        |

Values in parentheses are for the highest resolution shell.

Supplementary Table S4. X-ray diffraction data statistics of 23 lysozyme crystals in SDVD crystallization plate in same size

| Diffraction data statistics of lysozyme crystals in SDVD crystallization plate |                                |                                |                                |                                |                                |
|--------------------------------------------------------------------------------|--------------------------------|--------------------------------|--------------------------------|--------------------------------|--------------------------------|
| □                                                                              | Crystal 1                      | Crystal 2                      | Crystal 3                      | Crystal 4                      | Crystal 5                      |
| Resolution range (Å)                                                           | 50-1.86<br>(1.89-1.86)         | 50-1.86<br>(1.89-1.86)         | 50-1.88<br>(1.91-1.88)         | 50-1.88<br>(1.91-1.88)         | 50-1.91<br>(1.94-1.91)         |
| Mosaicity (°)                                                                  | 0.61                           | 0.91                           | 0.75                           | 0.82                           | 0.71                           |
| $\langle I \rangle / \langle \sigma(I) \rangle$                                | 18.51 (2.04)                   | 15.43 (2.49)                   | 11.83 (2.70)                   | 13.74 (2.13)                   | 14.69 (2.01)                   |
| Wilson Plot B factor                                                           | 18.60                          | 18.60                          | 24.90                          | 28.30                          | 22.90                          |
| Space group                                                                    | $P4_32_12$                     | $P4_32_12$                     | $P4_32_12$                     | $P4_32_12$                     | $P4_32_12$                     |
| Cell dimensions                                                                | $a = 78.49$<br>$b = 78.49$     | $a = 77.36$<br>$b = 77.36$     | $a = 75.79$<br>$b = 75.79$     | $a = 77.78$<br>$b = 77.78$     | $a = 76.30$<br>$b = 76.30$     |
| $a, b, c$ (Å)                                                                  | $c = 37.21$                    | $c = 37.52$                    | $c = 36.61$                    | $c = 37.54$                    | $c = 36.65$                    |
| $\alpha, \beta, \gamma$ (°)                                                    | $\alpha = \beta = \gamma = 90$ |
| Exposure time (min)                                                            |                                |                                | 5                              |                                |                                |
| Oscillation angle (°)                                                          |                                |                                | 1                              |                                |                                |
| Detector distance (mm)                                                         |                                |                                | 150                            |                                |                                |
| Wavelength (Å)                                                                 |                                |                                | 1.54179                        |                                |                                |

Values in parentheses are for the highest resolution shell.

Continued Supplementary Table S4

| Diffraction data statistics of lysozyme crystals in SDVD crystallization plate |                                          |                                          |                                          |                                          |                                          |
|--------------------------------------------------------------------------------|------------------------------------------|------------------------------------------|------------------------------------------|------------------------------------------|------------------------------------------|
| ☐                                                                              | Crystal 6                                | Crystal 7                                | Crystal 8                                | Crystal 9                                | Crystal 10                               |
| Resolution range                                                               | 50-1.93                                  | 50-2.00                                  | 50-2.02                                  | 50-2.03                                  | 50-2.03                                  |
| (Å)                                                                            | (1.96-1.93)                              | (2.03-2.00)                              | (2.05-2.02)                              | (2.06-2.03)                              | (2.06-2.03)                              |
| Mosaicity (°)                                                                  | 0.85                                     | 0.95                                     | 0.60                                     | 0.54                                     | 0.94                                     |
| $\langle I \rangle / \langle \sigma(I) \rangle$                                | 10.35 (2.33)                             | 21.78 (2.37)                             | 13.51 (2.07)                             | 13.10 (2.02)                             | 15.47 (2.68)                             |
| Wilson Plot B factor                                                           | 20.60                                    | 20.10                                    | 23.70                                    | 21.90                                    | 22.60                                    |
| Space group                                                                    | <i>P</i> 4 <sub>3</sub> 2 <sub>1</sub> 2 |
| Cell dimensions                                                                | <i>a</i> = 78.73                         | <i>a</i> = 78.87                         | <i>a</i> = 76.99                         | <i>a</i> = 77.97                         | <i>a</i> = 77.69                         |
| <i>a</i> , <i>b</i> , <i>c</i> (Å)                                             | <i>b</i> = 78.73                         | <i>b</i> = 78.87                         | <i>b</i> = 76.99                         | <i>b</i> = 77.97                         | <i>b</i> = 77.69                         |
|                                                                                | <i>c</i> = 37.99                         | <i>c</i> = 37.26                         | <i>c</i> = 37.11                         | <i>c</i> = 37.85                         | <i>c</i> = 37.85                         |
| $\alpha$ , $\beta$ , $\gamma$ (°)                                              | $\alpha = \beta = \gamma = 90$           |
| Exposure time (min)                                                            |                                          |                                          | 5                                        |                                          |                                          |
| Oscillation angle (°)                                                          |                                          |                                          | 1                                        |                                          |                                          |
| Detector distance (mm)                                                         |                                          |                                          | 150                                      |                                          |                                          |
| Wavelength (Å)                                                                 |                                          |                                          | 1.54179                                  |                                          |                                          |

Values in parentheses are for the highest resolution shell.

Continued Supplementary Table S4

| Diffraction data statistics of lysozyme crystals in SDVD crystallization plate |                                |                                |                                |                                |                                |
|--------------------------------------------------------------------------------|--------------------------------|--------------------------------|--------------------------------|--------------------------------|--------------------------------|
| ☐                                                                              | Crystal 11                     | Crystal 12                     | Crystal 13                     | Crystal 14                     | Crystal 15                     |
| Resolution range                                                               | 50-2.08                        | 50-2.10                        | 50-2.12                        | 50-2.15                        | 50-2.24                        |
| (Å)                                                                            | (2.12-2.08)                    | (2.14-2.10)                    | (2.16-2.12)                    | (2.19-2.15)                    | (2.28-2.24)                    |
| Mosaicity (°)                                                                  | 1.32                           | 1.89                           | 0.92                           | 0.96                           | 1.38                           |
| $\langle I \rangle / \langle \sigma(I) \rangle$                                | 12.22 (3.18)                   | 15.39 (6.07)                   | 12.25 (2.26)                   | 18.89 (5.41)                   | 16.04 (2.48)                   |
| Wilson Plot B factor                                                           | 23.50                          | 12.80                          | 22.00                          | 21.80                          | 26.00                          |
| Space group                                                                    | $P4_32_12$                     | $P4_32_12$                     | $P4_32_12$                     | $P4_32_12$                     | $P4_32_12$                     |
| Cell dimensions                                                                | $a = 76.44$                    | $a = 76.50$                    | $a = 75.87$                    | $a = 78.02$                    | $a = 79.00$                    |
| $a, b, c$ (Å)                                                                  | $b = 76.44$                    | $b = 76.50$                    | $b = 75.87$                    | $b = 78.02$                    | $b = 79.00$                    |
| $\alpha, \beta, \gamma$ (°)                                                    | $c = 36.73$                    | $c = 37.62$                    | $c = 37.73$                    | $c = 37.48$                    | $c = 35.94$                    |
|                                                                                | $\alpha = \beta = \gamma = 90$ |
| Exposure time (min)                                                            |                                |                                | 5                              |                                |                                |
| Oscillation angle (°)                                                          |                                |                                | 1                              |                                |                                |
| Detector distance (mm)                                                         |                                |                                | 150                            |                                |                                |
| Wavelength (Å)                                                                 |                                |                                | 1.54179                        |                                |                                |

Values in parentheses are for the highest resolution shell.

Continued Supplementary Table S4

| Diffraction data statistics of lysozyme crystals in SDVD crystallization plate |                                |                                |                                |                                |                                |
|--------------------------------------------------------------------------------|--------------------------------|--------------------------------|--------------------------------|--------------------------------|--------------------------------|
| ☐                                                                              | Crystal 16                     | Crystal 17                     | Crystal 18                     | Crystal 19                     | Crystal 20                     |
| Resolution range                                                               | 50-2.26                        | 50-2.28                        | 50-2.45                        | 50-2.51                        | 50-2.61                        |
| (Å)                                                                            | (2.30-2.26)                    | (2.32-2.28)                    | (2.49-2.45)                    | (2.55-2.51)                    | (2.66-2.61)                    |
| Mosaicity (°)                                                                  | 1.04                           | 1.12                           | 0.74                           | 0.85                           | 1.45                           |
| $\langle I \rangle / \langle \sigma(I) \rangle$                                | 10.16 (3.49)                   | 18.87 (2.69)                   | 9.40 (2.05)                    | 12.20 (2.78)                   | 7.11 (3.35)                    |
| Wilson Plot B factor                                                           | 24.40                          | 24.40                          | 27.40                          | 28.50                          | 32.90                          |
| Space group                                                                    | $P4_32_12$                     | $P4_32_12$                     | $P4_32_12$                     | $P4_32_12$                     | $P4_32_12$                     |
| Cell dimensions                                                                | $a = 76.48$                    | $a = 75.70$                    | $a = 76.90$                    | $a = 76.01$                    | $a = 76.54$                    |
|                                                                                | $b = 76.48$                    | $b = 75.70$                    | $b = 76.90$                    | $b = 76.01$                    | $b = 76.54$                    |
|                                                                                | $c = 37.01$                    | $c = 36.21$                    | $c = 37.50$                    | $c = 37.01$                    | $c = 36.97$                    |
| $\alpha, \beta, \gamma$ (°)                                                    | $\alpha = \beta = \gamma = 90$ |
| Exposure time (min)                                                            |                                |                                | 5                              |                                |                                |
| Oscillation angle (°)                                                          |                                |                                | 1                              |                                |                                |
| Detector distance (mm)                                                         |                                |                                | 150                            |                                |                                |
| Wavelength (Å)                                                                 |                                |                                | 1.54179                        |                                |                                |

Values in parentheses are for the highest resolution shell.



Continued Supplementary Table S4

| □                                               | Diffraction data statistics of lysozyme crystals in SDVD |                                |                                |
|-------------------------------------------------|----------------------------------------------------------|--------------------------------|--------------------------------|
|                                                 | crystallization plate                                    |                                |                                |
|                                                 | Crystal 21                                               | Crystal 22                     | Crystal 23                     |
| Resolution range (Å)                            | 50-2.80<br>(2.85-2.80)                                   | 50-3.25<br>(3.31-3.25)         | 50-3.45<br>(3.51-3.45)         |
| Mosaicity (°)                                   | 0.95                                                     | 1.48                           | 1.45                           |
| $\langle I \rangle / \langle \sigma(I) \rangle$ | 13.61 (2.62)                                             | 10.31 (73.05)                  | 10.51 (2.34)                   |
| Wilson Plot B factor                            | 30.90                                                    | 31.20                          | 29.80                          |
| Space group                                     | $P4_32_12$                                               | $P4_32_12$                     | $P4_32_12$                     |
| Cell dimensions                                 | $a = 75.73$                                              | $a = 75.54$                    | $a = 76.08$                    |
| $a, b, c$ (Å)                                   | $b = 75.73$                                              | $b = 75.54$                    | $b = 76.08$                    |
| $\alpha, \beta, \gamma$ (°)                     | $c = 36.49$                                              | $c = 36.54$                    | $c = 37.30$                    |
|                                                 | $\alpha = \beta = \gamma = 90$                           | $\alpha = \beta = \gamma = 90$ | $\alpha = \beta = \gamma = 90$ |
| Exposure time (min)                             |                                                          | 5                              |                                |
| Oscillation angle (°)                           |                                                          | 1                              |                                |
| Detector distance<br>(mm)                       |                                                          | 150                            |                                |
| Wavelength (Å)                                  |                                                          | 1.54179                        |                                |

Values in parentheses are for the highest resolution shell.

Supplementary Table S5. X-ray diffraction data statistics of 8 ribonuclease A I crystals in CDM crystallization plate in same size

| Diffraction data statistics of ribonuclease A I crystals in CDM crystallization plate |                            |                            |                            |                            |                            |
|---------------------------------------------------------------------------------------|----------------------------|----------------------------|----------------------------|----------------------------|----------------------------|
| □                                                                                     | Crystal 1                  | Crystal 2                  | Crystal 3                  | Crystal 4                  | Crystal 5                  |
| Resolution range                                                                      | 50-1.84                    | 50-2.33                    | 50-2.69                    | 50-2.88                    | 50-2.88                    |
| (Å)                                                                                   | (1.87-1.84)                | (2.37-2.33)                | (2.74-2.69)                | (2.93-2.88)                | (2.93-2.88)                |
| Mosaicity (°)                                                                         | 0.95                       | 1.29                       | 1.85                       | 1.28                       | 1.04                       |
| $\langle I \rangle / \langle \sigma(I) \rangle$                                       | 13.31 (5.0)                | 13.37 (2.51)               | 9.29 (2.01)                | 9.80 (3.45)                | 7.36 (3.33)                |
| Wilson Plot B factor                                                                  | 13.40                      | 33.40                      | 20.30                      | 24.00                      | 21.20                      |
| Space group                                                                           | <i>P</i> 6 <sub>2</sub> 22 |
| Cell dimensions                                                                       | <i>a</i> = 63.63           | <i>a</i> = 64.02           | <i>a</i> = 66.16           | <i>a</i> = 63.68           | <i>a</i> = 63.59           |
| <i>a, b, c</i> (Å)                                                                    | <i>b</i> = 63.63           | <i>b</i> = 64.02           | <i>b</i> = 66.16           | <i>b</i> = 63.68           | <i>b</i> = 63.59           |
| $\alpha, \beta, \gamma$ (°)                                                           | <i>c</i> = 63.35           | <i>c</i> = 64.21           | <i>c</i> = 69.54           | <i>c</i> = 64.36           | <i>c</i> = 64.49           |
|                                                                                       | $\alpha = \beta = 90$      |
|                                                                                       | $\gamma = 120$             |
| Exposure time (min)                                                                   |                            |                            | 10                         |                            |                            |
| Oscillation angle (°)                                                                 |                            |                            | 1                          |                            |                            |
| Detector distance                                                                     |                            |                            | 150                        |                            |                            |

---

(mm)

Wavelength (Å) 1.54179

---

Values in parentheses are for the highest resolution shell.

Continued Supplementary Table S5

| □                                               | Diffraction data statistics of ribonuclease A I crystals in |                            |                            |
|-------------------------------------------------|-------------------------------------------------------------|----------------------------|----------------------------|
|                                                 | CDM crystallization plate                                   |                            |                            |
|                                                 | Crystal 6                                                   | Crystal 7                  | Crystal 8                  |
| Resolution range                                | 50-3.16                                                     | 50-3.18                    | 50-3.52                    |
| (Å)                                             | (3.21-3.16)                                                 | (3.23-3.18)                | (3.58-3.52)                |
| Mosaicity (°)                                   | 1.36                                                        | 1.28                       | 2.28                       |
| $\langle I \rangle / \langle \sigma(I) \rangle$ | 5.88 (2.07)                                                 | 7.26 (2.13)                | 6.26 (2.36)                |
| Wilson Plot B factor                            | 28.10                                                       | 30.80                      | 33.00                      |
| Space group                                     | <i>P</i> 6 <sub>2</sub> 22                                  | <i>P</i> 6 <sub>2</sub> 22 | <i>P</i> 6 <sub>2</sub> 22 |
| Cell dimensions                                 | <i>a</i> = 63.51                                            | <i>a</i> = 63.61           | <i>a</i> = 64.91           |
|                                                 | <i>b</i> = 63.51                                            | <i>b</i> = 63.61           | <i>b</i> = 64.91           |
|                                                 | <i>a, b, c</i> (Å)                                          | <i>c</i> = 63.41           | <i>c</i> = 64.08           |
| $\alpha, \beta, \gamma$ (°)                     | $\alpha = \beta = 90$                                       | $\alpha = \beta = 90$      | $\alpha = \beta = 90$      |
|                                                 | $\gamma = 120$                                              | $\gamma = 120$             | $\gamma = 120$             |
| Exposure time (min)                             | 10                                                          |                            |                            |

---

|                           |         |
|---------------------------|---------|
| Oscillation angle<br>(°)  | 1       |
| Detector distance<br>(mm) | 150     |
| Wavelength (Å)            | 1.54179 |

---

Values in parentheses are for the highest resolution shell.

Supplementary Table S6. The number of droplets containing amorphous precipitate in CDM and SDVD crystallization plates for the 11 different proteins.

| Protein                         | Number of amorphous precipitate conditions |      |
|---------------------------------|--------------------------------------------|------|
|                                 | CDM                                        | SDVD |
| Proteinase K                    | 15                                         | 11   |
| Lysozyme                        | 19                                         | 16   |
| Ribonuclease A I                | 5                                          | 0    |
| Concanavalin A VI               | 17                                         | 12   |
| Catalase                        | 13                                         | 11   |
| $\alpha$ -chymotrypsinogen A II | 9                                          | 2    |
| $\alpha$ -chymotrypsin II       | 14                                         | 10   |
| Myoglobin                       | 8                                          | 11   |
| Cellulase                       | 6                                          | 4    |
| Hemoglobin                      | 12                                         | 7    |
| Ribonuclease A III              | 10                                         | 3    |

---
